# Supplementary material
Source: PubMed Central journal article supplement (PMC307629)
Supplement: pnas_100_26_15688__2.pdf [file pnas_100_26_15688__2.pdf]

**Table 2. *Clostridium tetani* E88 and *Mycobacterium tuberculosis* H37Rv**

| NCBI gi numbers  |                        | Bit scores       |                                                       |           |
|------------------|------------------------|------------------|-------------------------------------------------------|-----------|
|                  |                        | BLOSUM-62 matrix | BLOSUM-62 adjusted using background frequencies from: |           |
| <i>C. tetani</i> | <i>M. tuberculosis</i> |                  | Organisms                                             | Sequences |
| 28210292         | 15610359               | 60.0             | 59.5                                                  | 60.9      |
| 28212163         | 15607860               | 99.1             | 108.8                                                 | 102.3     |
| 28212096         | 15609660               | 65.9             | 68.1                                                  | 69.5      |
| 28211234         | 15608839               | 68.4             | 73.8                                                  | 75.5      |
| 28209987         | 15610383               | 77.3             | 76.1                                                  | 80.0      |
| 28210591         | 15608155               | 49.7             | 49.4                                                  | 57.3      |
| 28211797         | 15610089               | 55.8             | 55.3                                                  | 58.1      |
| 28209852         | 15607379               | 67.7             | 67.1                                                  | 69.1      |
| 28210939         | 15610040               | 91.0             | 99.2                                                  | 97.1      |
| 28210228         | 15610232               | 64.4             | 61.4                                                  | 60.9      |
| 28211520         | 15608567               | 52.5             | 53.8                                                  | 53.3      |
| 28211258         | 15609676               | 73.3             | 75.8                                                  | 77.2      |
| 28212030         | 15610556               | 60.3             | 59.8                                                  | 60.5      |
| 28210422         | 15609180               | 66.4             | 69.0                                                  | 71.9      |
| 28211792         | 15609852               | 67.7             | 65.1                                                  | 70.1      |
| 28212200         | 15608583               | 49.6             | 53.0                                                  | 54.2      |
| 28212161         | 15607863               | 89.2             | 101.2                                                 | 93.3      |
| 28209999         | 15610717               | 95.0             | 98.3                                                  | 99.8      |
| 28209970         | 15610761               | 79.2             | 84.4                                                  | 80.1      |
| 28210011         | 15608149               | 58.4             | 60.7                                                  | 60.8      |
| 28210095         | 15609720               | 41.1             | 44.1                                                  | 44.8      |
| 28211626         | 15609554               | 69.3             | 72.4                                                  | 73.4      |
| 28211852         | 15608236               | 86.4             | 85.3                                                  | 89.9      |
| 28212101         | 15609844               | 47.4             | 40.7                                                  | 46.3      |
| 28212078         | 15607623               | 88.1             | 90.0                                                  | 89.9      |
| 28211879         | 15609829               | 48.9             | 41.1                                                  | 51.2      |
| 28210107         | 15611051               | 51.5             | 53.1                                                  | 53.0      |
| 28210321         | 15608225               | 81.5             | 82.5                                                  | 86.7      |
| 28210952         | 15610018               | 88.1             | 88.0                                                  | 89.9      |
| 28210914         | 15610364               | 84.1             | 89.1                                                  | 88.4      |
| 28211381         | 15608764               | 83.4             | 88.9                                                  | 84.2      |
| 28209882         | 15609974               | 64.7             | 67.8                                                  | 64.2      |
| 28211512         | 15608676               | 72.7             | 74.9                                                  | 74.8      |
| 28210029         | 15607833               | 66.6             | 60.8                                                  | 67.4      |
| 28209843         | 15610335               | 51.7             | 53.3                                                  | 51.9      |
| 28210521         | 15608292               | 55.5             | 53.9                                                  | 55.1      |
| 28209938         | 15607547               | 52.1             | 50.0                                                  | 49.3      |
| 28209917         | 15607666               | 61.1             | 60.8                                                  | 60.8      |
| 28211180         | 15607361               | 89.1             | 91.7                                                  | 94.0      |
| 28210077         | 15608090               | 58.7             | 58.6                                                  | 59.0      |

Reference organism: *Bacillus subtilis* subsp. *subtilis* str. 168.
