# Supplementary material
Source: PubMed Central journal article supplement (PMC307629)
Supplement: pnas_100_26_15688__3.pdf [file pnas_100_26_15688__3.pdf]

**Table 3. *Bacillus subtilis* subsp. *subtilis* str. 168 and *Lactococcus lactis* subsp. *lactis***

| NCBI gi numbers    |                  | Bit scores       |                                                       |           |
|--------------------|------------------|------------------|-------------------------------------------------------|-----------|
|                    |                  | BLOSUM-62 matrix | BLOSUM-62 adjusted using background frequencies from: |           |
| <i>B. subtilis</i> | <i>L. lactis</i> |                  | Organisms                                             | Sequences |
| 16077385           | 538899           | 69.4             | 69.8                                                  | 71.6      |
| 16079907           | 15672219         | 46.4             | 48.2                                                  | 49.0      |
| 16079023           | 15672987         | 55.7             | 57.3                                                  | 57.9      |
| 16079602           | 1170025          | 76.6             | 98.0                                                  | 84.0      |
| 16080533           | 15674211         | 86.8             | 89.8                                                  | 81.4      |
| 16079303           | 15674120         | 69.0             | 69.8                                                  | 72.3      |
| 16078118           | 15672719         | 53.3             | 54.7                                                  | 55.2      |
| 16078098           | 15672318         | 63.8             | 65.1                                                  | 66.2      |
| 16077695           | 15672802         | 82.1             | 81.0                                                  | 83.2      |
| 16080244           | 15673219         | 67.3             | 68.4                                                  | 71.2      |
| 16080517           | 15672476         | 74.7             | 74.8                                                  | 75.5      |
| 16078077           | 15673549         | 63.8             | 62.9                                                  | 67.0      |
| 16079733           | 15673769         | 85.6             | 87.4                                                  | 86.2      |
| 16079393           | 15672875         | 85.6             | 91.8                                                  | 89.9      |
| 16078655           | 15672754         | 37.5             | 49.0                                                  | 40.1      |
| 16078972           | 18450342         | 45.4             | 45.8                                                  | 47.3      |
| 16077668           | 15674233         | 40.7             | 41.5                                                  | 43.9      |
| 16078967           | 15672109         | 71.0             | 71.2                                                  | 73.0      |
| 16077192           | 15674073         | 39.9             | 47.4                                                  | 40.9      |
| 16077714           | 11356450         | 56.4             | 59.3                                                  | 58.9      |
| 16077455           | 15672567         | 48.9             | 51.8                                                  | 50.7      |
| 16077549           | 13095874         | 41.0             | 44.1                                                  | 44.2      |
| 16077500           | 15673603         | 51.4             | 52.0                                                  | 52.0      |
| 16077084           | 15672523         | 57.0             | 56.3                                                  | 58.9      |
| 16078645           | 15672174         | 54.2             | 58.7                                                  | 54.9      |
| 16080885           | 15672105         | 51.3             | 46.0                                                  | 55.0      |
| 16080976           | 15672861         | 67.6             | 68.9                                                  | 69.6      |
| 16080103           | 15673548         | 81.1             | 81.9                                                  | 82.1      |
| 16081123           | 15672724         | 44.1             | 43.3                                                  | 46.3      |
| 16078382           | 15672703         | 70.9             | 71.7                                                  | 72.4      |
| 16079510           | 15674006         | 81.2             | 82.2                                                  | 84.1      |
| 16080027           | 15674179         | 45.4             | 45.6                                                  | 43.6      |
| 16078632           | 15673880         | 35.6             | 40.3                                                  | 38.4      |
| 16079352           | 15672320         | 55.6             | 56.0                                                  | 57.6      |
| 16079361           | 15673687         | 39.1             | 40.2                                                  | 41.3      |
| 16078396           | 25402154         | 61.0             | 63.3                                                  | 62.6      |
| 16080218           | 15672708         | 56.3             | 53.8                                                  | 56.9      |

Reference organism: *Mycobacterium tuberculosis* H37Rv.
