# Supplementary material
Source: PubMed Central journal article supplement (PMC307629)
Supplement: pnas_100_26_15688__4.pdf [file pnas_100_26_15688__4.pdf]

**Table 4. *Mycobacterium tuberculosis* H37Rv and *Streptomyces coelicolor* A3 (2)**

| NCBI gi numbers        |                      | Bit scores       |                                                       |           |
|------------------------|----------------------|------------------|-------------------------------------------------------|-----------|
|                        |                      | BLOSUM-62 matrix | BLOSUM-62 adjusted using background frequencies from: |           |
| <i>M. tuberculosis</i> | <i>S. coelicolor</i> |                  | Organisms                                             | Sequences |
| 15607619               | 21223288             | 84.5             | 91.7                                                  | 87.6      |
| 15609660               | 21223123             | 51.5             | 56.0                                                  | 54.4      |
| 15610089               | 21220785             | 50.7             | 50.5                                                  | 51.8      |
| 15608567               | 21219237             | 46.5             | 46.8                                                  | 50.9      |
| 15610804               | 21219257             | 44.6             | 51.1                                                  | 48.3      |
| 15610502               | 21220094             | 39.2             | 39.8                                                  | 40.8      |
| 15608428               | 21224907             | 68.3             | 70.7                                                  | 71.3      |
| 15607952               | 21220045             | 85.2             | 87.6                                                  | 88.8      |
| 15607778               | 21223028             | 60.5             | 59.4                                                  | 60.6      |
| 15609167               | 21222005             | 48.5             | 54.0                                                  | 52.1      |
| 15609231               | 21220129             | 57.0             | 58.9                                                  | 59.5      |
| 15608971               | 21221335             | 45.8             | 40.0                                                  | 46.4      |
| 15607967               | 21219816             | 71.3             | 72.3                                                  | 74.3      |
| 15609191               | 21225633             | 65.1             | 69.0                                                  | 71.2      |
| 15610128               | 21219863             | 73.5             | 73.6                                                  | 76.0      |
| 15608482               | 21223774             | 69.3             | 68.7                                                  | 72.4      |
| 15610607               | 21223853             | 42.9             | 43.9                                                  | 43.8      |
| 15608366               | 32141202             | 56.6             | 59.4                                                  | 57.5      |
| 15610470               | 21219091             | 66.5             | 68.0                                                  | 67.6      |
| 15607184               | 21218989             | 60.3             | 61.9                                                  | 62.0      |
| 15608189               | 21225956             | 44.6             | 44.9                                                  | 46.5      |
| 15608658               | 21218941             | 55.9             | 59.2                                                  | 60.5      |
| 15608398               | 21220527             | 62.6             | 60.4                                                  | 69.1      |
| 15610622               | 21225501             | 40.5             | 42.0                                                  | 43.6      |
| 15608672               | 21223539             | 59.9             | 63.7                                                  | 64.4      |
| 15610919               | 21221439             | 52.7             | 55.1                                                  | 53.0      |
| 15608364               | 21223519             | 50.2             | 51.6                                                  | 57.1      |
| 15610442               | 21222504             | 72.9             | 77.6                                                  | 76.5      |
| 15607226               | 21222985             | 39.5             | 39.1                                                  | 45.7      |
| 15609806               | 21223130             | 48.4             | 49.6                                                  | 49.3      |
| 15607774               | 21220010             | 66.3             | 67.3                                                  | 67.3      |
| 15609444               | 21222015             | 49.7             | 49.1                                                  | 50.5      |
| 15610064               | 21223925             | 88.6             | 88.6                                                  | 88.9      |
| 15609925               | 21222420             | 73.5             | 77.7                                                  | 75.8      |

Reference organism: *Bacillus subtilis* subsp. *subtilis* str. 168.
