# Supplementary material
Source: PubMed Central journal article supplement (PMC307629)
Supplement: pnas_100_26_15688__5.pdf [file pnas_100_26_15688__5.pdf]

**Table 5. Sequence pairs associated with structural data**

| NCBI gi numbers |          | Bit scores       |                 | Alignment extension |       |
|-----------------|----------|------------------|-----------------|---------------------|-------|
|                 |          | BLOSUM-62 matrix | Adjusted matrix | Left                | Right |
| 30749342        | 15609900 | 54.6             | 57.8            | 0                   | 0     |
| 2624735         | 21219111 | 82.5             | 86.9            | 53                  | 2     |
| 28948857        | 6137489  | 57.7             | 55.5            | 97                  | 0     |
| 22219360        | 18418224 | 31.5             | 34.3            | 0                   | 0     |
| 23613598        | 15674896 | 43.6             | 45.0            | -1                  | 0     |
| 123499          | 4502171  | 31.0             | 32.2            | 0                   | -5    |
| 3319034         | 19703667 | 36.6             | 39.9            | 0                   | 90    |
| 2392498         | 33358140 | 37.5             | 35.2            | 18                  | 0     |
| 28209987        | 15610383 | 77.3             | 80.0            | 0                   | 0     |
| 15894223        | 28948854 | 97.0             | 97.4            | 0                   | 0     |
| 28212114        | 27574180 | 46.2             | 44.2            | 0                   | 0     |
| 28210575        | 22219354 | 57.6             | 58.5            | 4                   | 12    |
| 16079353        | 15610243 | 28.2             | 28.9            | 0                   | 3     |
| 15895916        | 15609357 | 41.6             | 42.9            | 0                   | 0     |
| 18309683        | 15609676 | 66.1             | 70.1            | 1                   | 67    |
| 28210205        | 13399468 | 30.6             | 28.6            | 0                   | 0     |
| 18310891        | 6014910  | 91.5             | 89.6            | 0                   | 0     |
| 15895827        | 15610982 | 61.3             | 63.3            | 0                   | 0     |
| 15004757        | 14278695 | 93.1             | 96.8            | 0                   | 0     |
| 15894130        | 28373649 | 32.5             | 32.0            | 0                   | 0     |
| 15895511        | 18158792 | 44.4             | 49.8            | 1                   | 8     |
| 15893474        | 1127200  | 39.9             | 44.0            | 48                  | 91    |
| 15893312        | 3915100  | 29.9             | 30.9            | 0                   | 0     |
| 15894597        | 17943056 | 62.1             | 59.8            | -1                  | 1     |
| 15894033        | 3024624  | 25.4             | 26.7            | 0                   | 0     |
| 28210529        | 3892001  | 44.7             | 43.3            | 0                   | 13    |
| 15893754        | 1633298  | 34.5             | 35.3            | 0                   | 28    |
| 15594366        | 1346693  | 67.4             | 64.5            | 0                   | 2     |
| 11497009        | 15827115 | 68.0             | 69.5            | 1                   | 38    |
| 29726767        | 11139534 | 37.9             | 41.3            | 0                   | -1    |
| 16805184        | 15607948 | 29.7             | 31.8            | 182                 | 1     |
| 102245          | 2498360  | 31.3             | 35.7            | 19                  | 0     |

A test set of sequence pairs for which three-dimensional structural evidence provides support for alignment accuracy and at least one of the sequences is from an organism with strong compositional bias. The sequence pairs meet the following criteria: (i) the normalized BLOSUM-62 alignment is <100 bits, with as many as possible <40 bits; (ii) a crystal or NMR structure exists for each sequence or (because relatively few proteins from strongly biased organisms have known structures) for a homologous sequence that is closely related enough to be aligned unambiguously; and (iii) a structural superposition can be made that covers the aligned region well enough to define the corresponding secondary structure elements. The adjusted BLOSUM-62 matrices were constructed by using background frequencies from each sequence pair and pseudocounts as defined by the ‡ footnote in Table 1 of the main article; details of the bit score calculation and statistics are given in the \* footnote of Table 1. The lengths, in residues, of alignment extensions that were yielded by matrix adjustment (columns 5 and 6 above) include alignment positions in which amino acids are aligned with gaps. Of the organisms represented in this test set, the following are considered to have strong compositional bias in the sense discussed in ref. 1: *Plasmodium falciparum*, *Mycobacterium tuberculosis*, *Mycobacterium leprae*, *Mycobacterium ulcerans*, *Streptomyces coelicolor*, *Streptomyces lividans*, *Streptomyces fradiae*, *Fusobacterium nucleatum*, *Clostridium tetani*, *Clostridium acetobutylicum*, *Clostridium perfringens*, *Borrelia burgdorferi*, and *Dictyostelium discoideum*.
