# Supplementary material
Source: PubMed Central journal article supplement (PMC307629)
Supplement: pnas_100_26_15688__6.pdf [file pnas_100_26_15688__6.pdf]

**Table 6. Amino acid composition**

| Amino acid | BLOSUM-62<br>Background frequencies, % | <i>Plasmodium falciparum</i><br>NCBI gi 16805184, % | <i>Mycobacterium tuberculosis</i><br>NCBI gi 15607948, % |
|------------|----------------------------------------|-----------------------------------------------------|----------------------------------------------------------|
| A          | 7.4                                    | 4.8                                                 | 13.9                                                     |
| R          | 5.2                                    | 4.1                                                 | 7.4                                                      |
| N          | 4.5                                    | 8.9                                                 | 2.8                                                      |
| D          | 5.3                                    | 5.6                                                 | 5.9                                                      |
| C          | 2.5                                    | 2.1                                                 | 1.9                                                      |
| Q          | 3.4                                    | 3.0                                                 | 3.6                                                      |
| E          | 5.4                                    | 7.0                                                 | 6.1                                                      |
| G          | 7.4                                    | 6.2                                                 | 9.5                                                      |
| H          | 2.6                                    | 3.1                                                 | 1.7                                                      |
| I          | 6.8                                    | 9.0                                                 | 4.4                                                      |
| L          | 9.9                                    | 8.2                                                 | 9.3                                                      |
| K          | 5.8                                    | 8.2                                                 | 1.9                                                      |
| M          | 2.5                                    | 1.3                                                 | 1.5                                                      |
| F          | 4.7                                    | 5.1                                                 | 2.5                                                      |
| P          | 3.9                                    | 3.8                                                 | 5.3                                                      |
| S          | 5.7                                    | 7.4                                                 | 4.4                                                      |
| T          | 5.1                                    | 2.3                                                 | 5.7                                                      |
| W          | 1.3                                    | 1.0                                                 | 0.8                                                      |
| Y          | 3.2                                    | 4.6                                                 | 2.8                                                      |
| V          | 7.3                                    | 4.4                                                 | 8.7                                                      |

The background amino acid frequencies implicit in the BLOSUM-62 amino acid substitution matrix and the amino acid composition of *P. falciparum* putative asparagine synthase (NCBI gi 16805184) and *M. tuberculosis* PurF protein (NCBI gi 15607948). Due to rounding, percentages do not sum to 100.0.
