# Supplementary material
Source: PubMed Central journal article supplement (PMC307629)
Supplement: pnas_100_26_15688__7.pdf [file pnas_100_26_15688__7.pdf]

**Table 7. Scaled BLOSUM-62 scores**

|   |      |      |      |      |      |      |      |      |      |      |      |      |      |      |      |      |      |      |      |      |
|---|------|------|------|------|------|------|------|------|------|------|------|------|------|------|------|------|------|------|------|------|
| A | 222  | -80  | -87  | -99  | -23  | -45  | -49  | 9    | -92  | -75  | -83  | -42  | -53  | -125 | -46  | 63   | -3   | -143 | -100 | -11  |
| R | -80  | 310  | -25  | -91  | -192 | 56   | -7   | -130 | -14  | -169 | -122 | 119  | -77  | -158 | -119 | -43  | -63  | -152 | -96  | -142 |
| N | -87  | -25  | 320  | 72   | -150 | 0    | -15  | -24  | 33   | -182 | -191 | -10  | -122 | -169 | -113 | 34   | -3   | -209 | -118 | -163 |
| D | -99  | -91  | 72   | 327  | -196 | -18  | 85   | -74  | -63  | -177 | -204 | -40  | -173 | -197 | -84  | -15  | -59  | -238 | -173 | -178 |
| C | -23  | -192 | -150 | -196 | 485  | -164 | -204 | -141 | -169 | -69  | -72  | -172 | -80  | -134 | -158 | -50  | -49  | -130 | -136 | -46  |
| Q | -45  | 56   | 0    | -18  | -164 | 299  | 105  | -101 | 25   | -157 | -121 | 72   | -24  | -179 | -73  | -6   | -38  | -110 | -80  | -124 |
| E | -49  | -7   | -15  | 85   | -204 | 105  | 277  | -119 | -7   | -181 | -161 | 44   | -113 | -181 | -63  | -8   | -49  | -160 | -114 | -138 |
| G | 9    | -130 | -24  | -74  | -141 | -101 | -119 | 315  | -115 | -211 | -205 | -86  | -151 | -176 | -121 | -17  | -89  | -141 | -172 | -178 |
| H | -92  | -14  | 33   | -63  | -169 | 25   | -7   | -115 | 425  | -183 | -158 | -41  | -88  | -70  | -122 | -50  | -95  | -132 | 96   | -176 |
| I | -75  | -169 | -182 | -177 | -69  | -157 | -181 | -211 | -183 | 226  | 86   | -151 | 64   | -9   | -156 | -133 | -41  | -146 | -75  | 144  |
| L | -83  | -122 | -191 | -204 | -72  | -121 | -161 | -205 | -158 | 86   | 218  | -138 | 113  | 23   | -162 | -138 | -68  | -92  | -60  | 45   |
| K | -42  | 119  | -10  | -40  | -172 | 72   | 44   | -86  | -41  | -151 | -138 | 255  | -77  | -174 | -57  | -12  | -38  | -167 | -103 | -128 |
| M | -53  | -77  | -122 | -173 | -80  | -24  | -113 | -151 | -88  | 64   | 113  | -77  | 305  | 1    | -140 | -84  | -38  | -81  | -56  | 39   |
| F | -125 | -158 | -169 | -197 | -134 | -179 | -181 | -176 | -70  | -9   | 23   | -174 | 1    | 342  | -204 | -134 | -119 | 52   | 166  | -48  |
| P | -46  | -119 | -113 | -84  | -158 | -73  | -63  | -121 | -122 | -156 | -162 | -57  | -140 | -204 | 417  | -46  | -61  | -207 | -165 | -133 |
| S | 63   | -43  | 34   | -15  | -50  | -6   | -8   | -17  | -50  | -133 | -138 | -12  | -84  | -134 | -46  | 220  | 78   | -156 | -95  | -93  |
| T | -3   | -63  | -3   | -59  | -49  | -38  | -49  | -89  | -95  | -41  | -68  | -38  | -38  | -119 | -61  | 78   | 257  | -137 | -91  | -3   |
| W | -143 | -152 | -209 | -238 | -130 | -110 | -160 | -141 | -132 | -146 | -92  | -167 | -81  | 52   | -207 | -156 | -137 | 594  | 122  | -160 |
| Y | -100 | -96  | -118 | -173 | -136 | -80  | -114 | -172 | 96   | -75  | -60  | -103 | -56  | 166  | -165 | -95  | -91  | 122  | 373  | -68  |
| V | -11  | -142 | -163 | -178 | -46  | -124 | -138 | -178 | -176 | 144  | 45   | -128 | 39   | -48  | -133 | -93  | -3   | -160 | -68  | 213  |
|   | A    | R    | N    | D    | C    | Q    | E    | G    | H    | I    | L    | K    | M    | F    | P    | S    | T    | W    | Y    | V    |

The standard BLOSUM-62 amino acid substitution matrix, scaled so that in the context of the compositions of two proteins under consideration, it has  $\lambda$  equal to 0.00635. Rows correspond to amino acids from the *Plasmodium falciparum* protein, and columns to amino acids from the *Mycobacterium tuberculosis* protein. To produce the alignment shown in Fig. 1a, this matrix is used in conjunction with gap costs of  $-550-50k$  for a gap of length  $k$ . This is equivalent to  $-11-k$  gap costs in the context of a standard BLAST search.
