# Supplementary material
Source: PubMed Central journal article supplement (PMC307629)
Supplement: pnas_100_26_15688__8.pdf [file pnas_100_26_15688__8.pdf]

**Table 8. Composition-specific BLOSUM-62 scores**

|   |     |      |      |      |      |      |      |      |      |      |      |      |      |      |      |      |      |      |      |      |
|---|-----|------|------|------|------|------|------|------|------|------|------|------|------|------|------|------|------|------|------|------|
| A | 207 | -135 | -203 | -175 | -68  | -105 | -122 | -14  | -190 | -129 | -128 | -119 | -92  | -217 | -80  | 11   | -34  | -222 | -202 | -45  |
| R | -76 | 301  | -108 | -134 | -212 | 30   | -47  | -128 | -80  | -196 | -138 | 79   | -86  | -219 | -124 | -68  | -66  | -201 | -167 | -150 |
| N | -39 | -3   | 294  | 78   | -126 | 16   | -12  | 26   | 13   | -167 | -166 | -12  | -89  | -188 | -75  | 55   | 41   | -217 | -146 | -129 |
| D | -80 | -99  | 10   | 315  | -201 | -30  | 65   | -54  | -114 | -188 | -207 | -70  | -169 | -244 | -72  | -23  | -46  | -275 | -231 | -172 |
| C | -2  | -206 | -224 | -230 | 504  | -184 | -239 | -126 | -226 | -79  | -73  | -209 | -75  | -181 | -152 | -61  | -37  | -165 | -195 | -37  |
| Q | -22 | 54   | -65  | -42  | -167 | 300  | 86   | -80  | -21  | -166 | -120 | 48   | -13  | -224 | -59  | -12  | -23  | -140 | -134 | -116 |
| E | -27 | -12  | -81  | 65   | -210 | 98   | 263  | -100 | -55  | -193 | -162 | 17   | -107 | -227 | -51  | -16  | -35  | -194 | -170 | -131 |
| G | -16 | -189 | -139 | -151 | -193 | -165 | -196 | 301  | -217 | -272 | -256 | -166 | -196 | -270 | -159 | -74  | -126 | -223 | -278 | -220 |
| H | -38 | 13   | 2    | -57  | -139 | 48   | 2    | -63  | 427  | -162 | -125 | -37  | -48  | -79  | -78  | -25  | -49  | -131 | 82   | -137 |
| I | -49 | -175 | -249 | -202 | -64  | -168 | -207 | -190 | -233 | 235  | 99   | -179 | 81   | -44  | -142 | -140 | -21  | -174 | -125 | 167  |
| L | -60 | -129 | -261 | -233 | -70  | -134 | -188 | -187 | -209 | 87   | 233  | -169 | 130  | -12  | -150 | -148 | -52  | -121 | -111 | 61   |
| K | 1   | 139  | -55  | -45  | -155 | 85   | 42   | -45  | -70  | -140 | -118 | 257  | -49  | -199 | -24  | 2    | -2   | -180 | -137 | -99  |
| M | -23 | -76  | -184 | -196 | -72  | -28  | -133 | -126 | -132 | 69   | 131  | -100 | 336  | -30  | -122 | -86  | -15  | -103 | -102 | 61   |
| F | -63 | -124 | -198 | -185 | -93  | -153 | -168 | -115 | -77  | 30   | 74   | -165 | 56   | 359  | -152 | -102 | -63  | 71   | 165  | 7    |
| P | -77 | -181 | -236 | -164 | -214 | -139 | -143 | -155 | -228 | -220 | -216 | -141 | -188 | -303 | 394  | -107 | -100 | -295 | -275 | -177 |
| S | 82  | -57  | -38  | -47  | -56  | -24  | -40  | -2   | -107 | -150 | -146 | -47  | -84  | -185 | -39  | 213  | 90   | -197 | -157 | -91  |
| T | 8   | -84  | -81  | -100 | -61  | -64  | -88  | -83  | -160 | -60  | -79  | -80  | -41  | -176 | -61  | 61   | 269  | -183 | -158 | -4   |
| W | -83 | -121 | -241 | -231 | -91  | -84  | -150 | -82  | -144 | -115 | -50  | -161 | -32  | 56   | -159 | -128 | -85  | 631  | 117  | -113 |
| Y | -48 | -73  | -156 | -173 | -107 | -63  | -112 | -124 | 83   | -52  | -26  | -104 | -17  | 165  | -125 | -75  | -47  | 131  | 368  | -27  |
| V | 2   | -163 | -246 | -220 | -56  | -152 | -179 | -172 | -243 | 133  | 39   | -172 | 39   | -100 | -134 | -115 | 1    | -206 | -133 | 222  |
|   | A   | R    | N    | D    | C    | Q    | E    | G    | H    | I    | L    | K    | M    | F    | P    | S    | T    | W    | Y    | V    |

A composition-adjusted BLOSUM-62 amino acid substitution matrix, based on the amino acid frequencies of the two proteins under consideration, each adjusted with 20 pseudocounts proportional to the implicit BLOSUM-62 background frequencies. In the context of these two sequences, this matrix has the same scale ( $\lambda = 0.00635$ ) and relative entropy (0.74 bits) as that in Table 7. This matrix is used in conjunction with  $-550$ - $50k$  gap costs to produce the optimal local alignment shown in Fig. 1*b*.
