# Supplementary material
Source: PubMed Central journal article supplement (PMC307629)
Supplement: pnas_100_26_15688__9.pdf [file pnas_100_26_15688__9.pdf]

**Table 9. Difference between composition-specific and standard BLOSUM-62 scores**

---

|   |     |     |      |     |     |     |     |     |      |     |     |     |     |     |     |     |     |     |      |     |
|---|-----|-----|------|-----|-----|-----|-----|-----|------|-----|-----|-----|-----|-----|-----|-----|-----|-----|------|-----|
| A | -15 | -55 | -116 | -76 | -45 | -60 | -73 | -23 | -98  | -54 | -45 | -77 | -39 | -92 | -34 | -52 | -31 | -79 | -102 | -34 |
| R | 4   | -9  | -83  | -43 | -20 | -26 | -40 | 2   | -66  | -27 | -16 | -40 | -9  | -61 | -5  | -25 | -3  | -49 | -71  | -8  |
| N | 48  | 22  | -26  | 6   | 24  | 16  | 3   | 50  | -20  | 15  | 25  | -2  | 33  | -19 | 38  | 21  | 44  | -8  | -28  | 34  |
| D | 19  | -8  | -62  | -12 | -5  | -12 | -20 | 20  | -51  | -11 | -3  | -30 | 4   | -47 | 12  | -8  | 13  | -37 | -58  | 6   |
| C | 21  | -14 | -74  | -34 | 19  | -20 | -35 | 15  | -57  | -10 | -1  | -37 | 5   | -47 | 6   | -11 | 12  | -35 | -59  | 9   |
| Q | 23  | -2  | -65  | -24 | -3  | 1   | -19 | 21  | -46  | -9  | 1   | -24 | 11  | -45 | 14  | -6  | 15  | -30 | -54  | 8   |
| E | 22  | -5  | -66  | -20 | -6  | -7  | -14 | 19  | -48  | -12 | -1  | -27 | 6   | -46 | 12  | -8  | 14  | -34 | -56  | 7   |
| G | -25 | -59 | -115 | -77 | -52 | -64 | -77 | -14 | -102 | -61 | -51 | -80 | -45 | -94 | -38 | -57 | -37 | -82 | -106 | -42 |
| H | 54  | 27  | -31  | 6   | 30  | 23  | 9   | 52  | 2    | 21  | 33  | 4   | 40  | -9  | 44  | 25  | 46  | 1   | -14  | 39  |
| I | 26  | -6  | -67  | -25 | 5   | -11 | -26 | 21  | -50  | 9   | 13  | -28 | 17  | -35 | 14  | -7  | 20  | -28 | -50  | 23  |
| L | 23  | -7  | -70  | -29 | 2   | -13 | -27 | 18  | -51  | 1   | 15  | -31 | 17  | -35 | 12  | -10 | 16  | -29 | -51  | 16  |
| K | 43  | 20  | -45  | -5  | 17  | 13  | -2  | 41  | -29  | 11  | 20  | 2   | 28  | -25 | 33  | 14  | 36  | -13 | -34  | 29  |
| M | 30  | 1   | -62  | -23 | 8   | -4  | -20 | 25  | -44  | 5   | 18  | -23 | 31  | -31 | 18  | -2  | 23  | -22 | -46  | 22  |
| F | 62  | 34  | -29  | 12  | 41  | 26  | 13  | 61  | -7   | 39  | 51  | 9   | 55  | 17  | 52  | 32  | 56  | 19  | -1   | 55  |
| P | -31 | -62 | -123 | -80 | -56 | -66 | -80 | -34 | -106 | -64 | -54 | -84 | -48 | -99 | -23 | -61 | -39 | -88 | -110 | -44 |
| S | 19  | -14 | -72  | -32 | -6  | -18 | -32 | 15  | -57  | -17 | -8  | -35 | 0   | -51 | 7   | -7  | 12  | -41 | -62  | 2   |
| T | 11  | -21 | -78  | -41 | -12 | -26 | -39 | 6   | -65  | -19 | -11 | -42 | -3  | -57 | 0   | -17 | 12  | -46 | -67  | -1  |
| W | 60  | 31  | -32  | 7   | 39  | 26  | 10  | 59  | -12  | 31  | 42  | 6   | 49  | 4   | 48  | 28  | 52  | 37  | -5   | 47  |
| Y | 52  | 23  | -38  | 0   | 29  | 17  | 2   | 48  | -13  | 23  | 34  | -1  | 39  | -1  | 40  | 20  | 44  | 9   | -5   | 41  |
| V | 13  | -21 | -83  | -42 | -10 | -28 | -41 | 6   | -67  | -11 | -6  | -44 | 0   | -52 | -1  | -22 | 4   | -46 | -65  | 9   |
|   | A   | R   | N    | D   | C   | Q   | E   | G   | H    | I   | L   | K   | M   | F   | P   | S   | T   | W   | Y    | V   |

---

The difference between the substitution matrices shown in Tables 7 and 8.
